# Supplementary material
Source: MDPI journal article supplement (https://www.mdpi.com/2075-163X/10/5/430)
Supplement: s1 [file s1]

Supplementary materials

# Forecast of AMD Quantity by a Series Tank Model in Three Stages: Case Studies in Two Closed Japanese Mines

Chiharu Tokoro <sup>1,\*</sup>, Kenichiro Fukaki <sup>2</sup>, Masakazu Kadokura <sup>2</sup> and Shigeshi Fuchida <sup>1</sup>

<sup>1</sup> Faculty of Science and Engineering, Waseda University, 3-4-1 Okubo, Shinjuku-ku, Tokyo 169-8555, Japan; sfuchida@aoni.waseda.jp

<sup>2</sup> Graduate School of Creative Science and Engineering, Waseda University, 3-4-1 Okubo, Shinjuku-ku, Tokyo 169-8555, Japan; kf-2219-rikoh@ruri.waseda.jp (K.F.); masa-kado0413@akane.waseda.jp (M.K.)

\* Correspondence: tokoro@waseda.jp; Tel.: +81-3-5286-3320

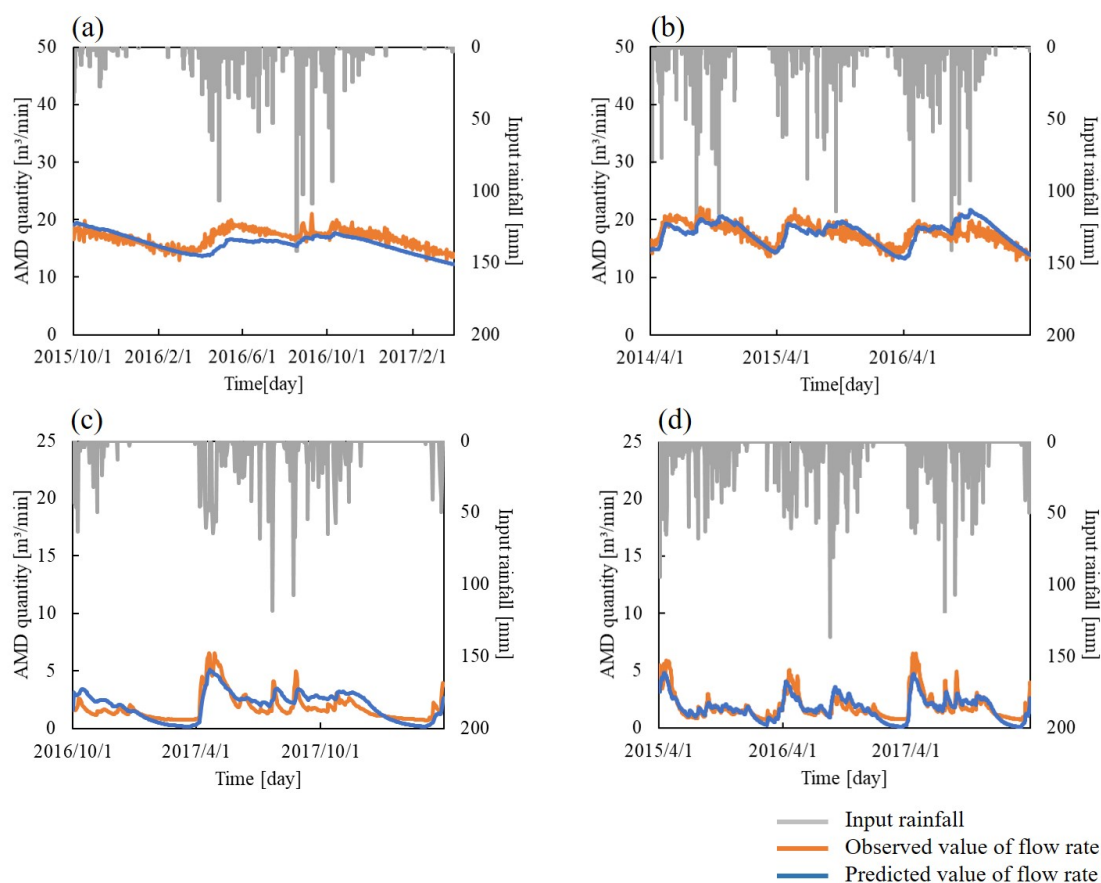

**Figure S1.** Observed and calculated AMD quantity by the tank model for (a) Mine A with half-year fitting, (b) Mine A with two-year fitting, (c) Mine B with half-year fitting, and (d) Mine B with two-year fitting.

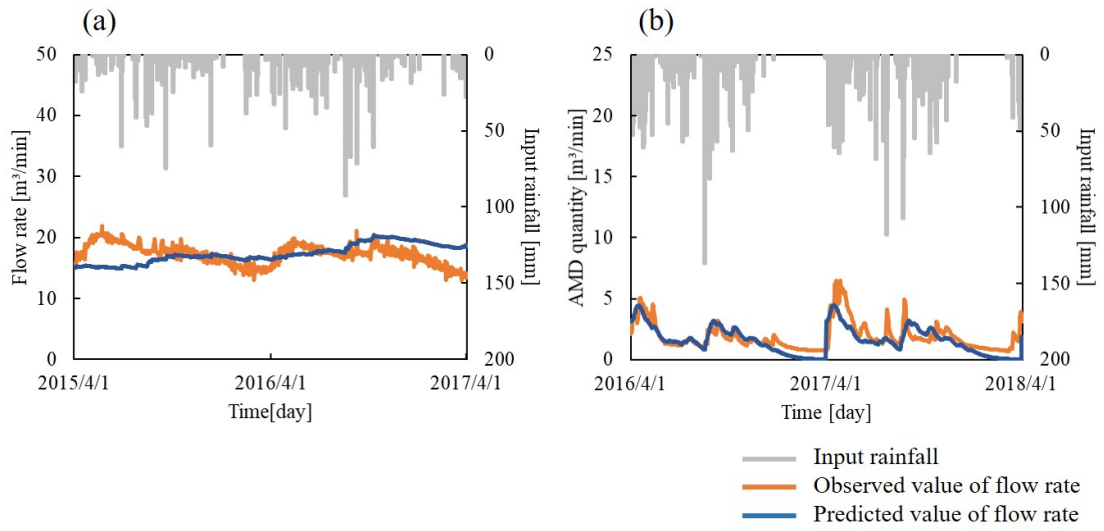

**Figure S2.** Observed and calculated AMD quantity by the tank model without correction of rainfall and temperature or considering snowmelt for (a) Mine A and (b) Mine B.
